# Supplementary material
Source: PubMed Central journal article supplement (PMC7280823)

**Chicago, IL**

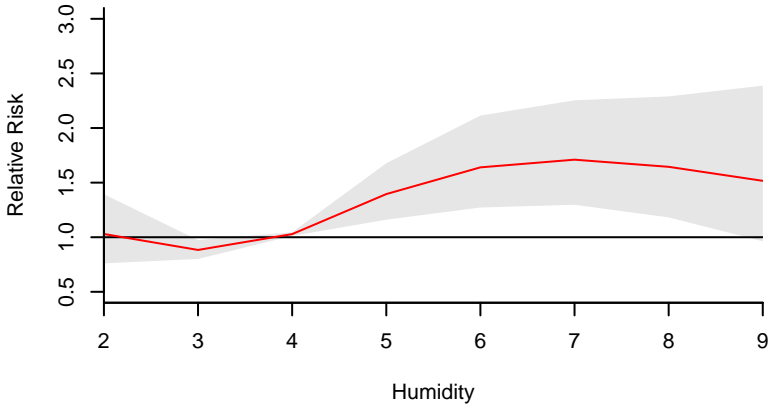

**Bridgeport–Stamford–Norwalk, CT**

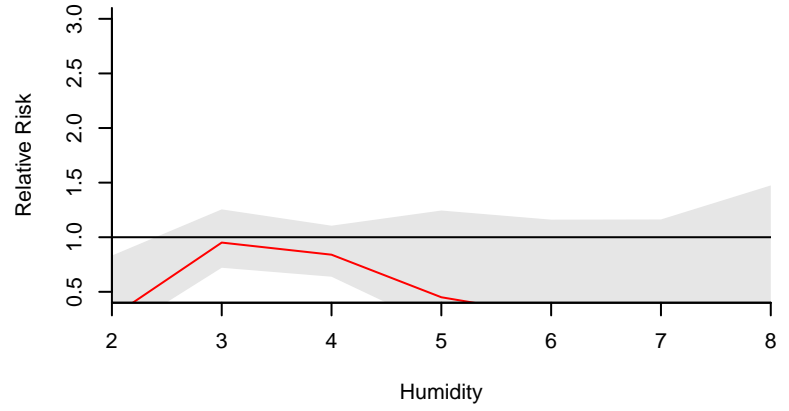

**Albany, GA**

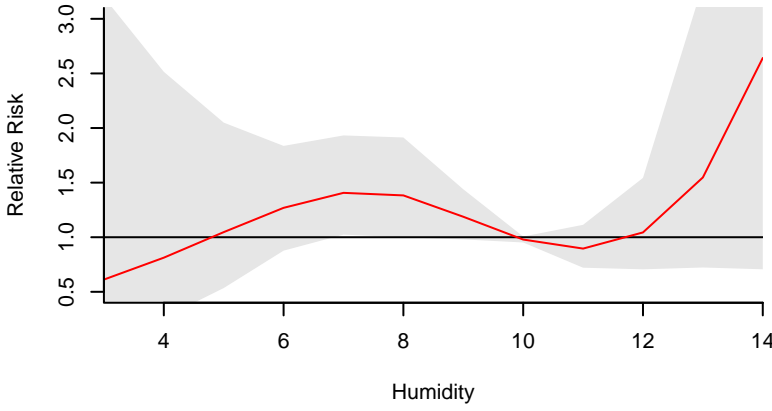

**Seattle, WA**

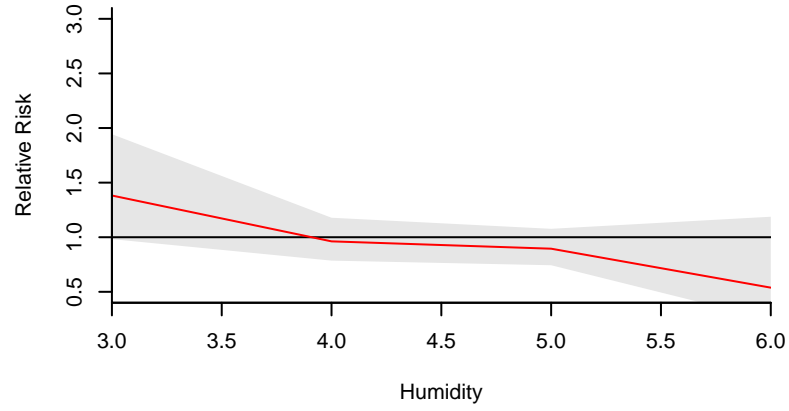

**New Orleans, LA**

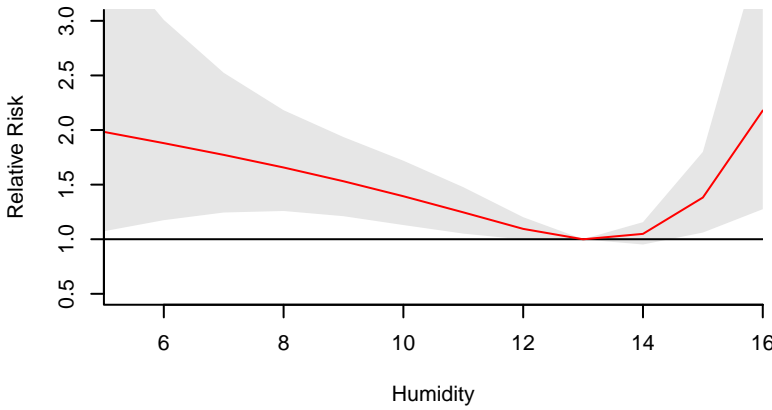

**Pittsfield, MA**

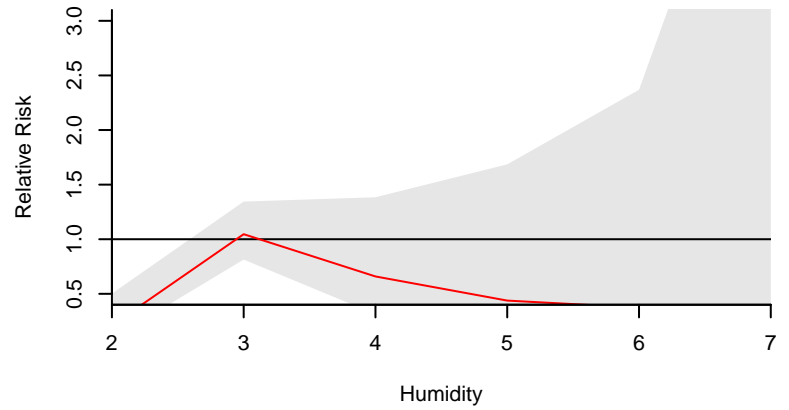

**Detroit, MI**

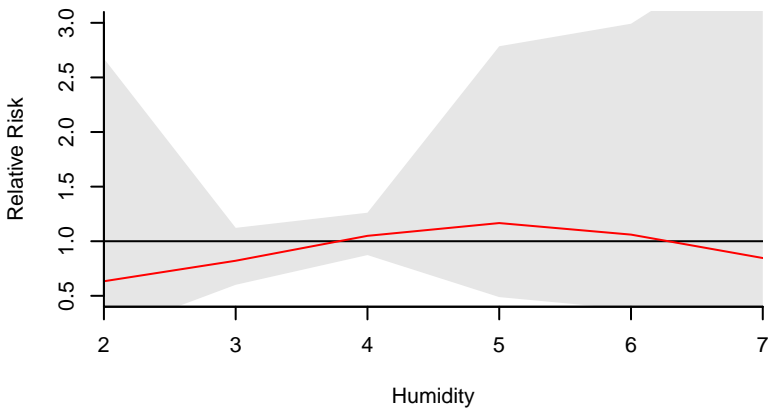

**New York City, NY**

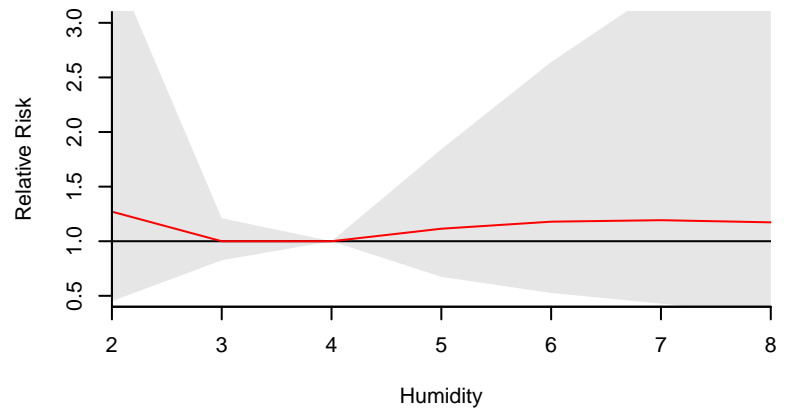

Supplement: mmc2.pdf [file mmc2.pdf]
